# Supplementary material for: Preclinical Anticancer Efficacy of BET Bromodomain Inhibitors Is Determined by the Apoptotic Response
Source: Oxford University Press journal article supplement (doi:10.1158/0008-5472.can-15-1458), 2016-01-13
Supplement: 00085472can151458-sup-150379_2_supp_3249567_nyp8pb.xlsx [file 00085472can151458-sup-150379_2_supp_3249567_nyp8pb.xlsx]

## Sheet: Sheet1
Cell line	Source
A375	ATCC
AMO-1	DSMZ
CA46	ATCC
CHL1	ATCC
CHP212	ATCC
Colo783	ATCC
Colo829	ATCC
Daudi	ATCC
DOHH2	DSMZ
H929	ATCC
HCC1143	ATCC
HCT116	ATCC
HCT15	ATCC
HL-60	ATCC
HT	ATCC
HT29	ATCC
IGR1	DSMZ
IGR39	DSMZ
JJN-3	DSMZ
K562	ATCC
KARPAS422	DSMZ
Kasumi-1	ATCC
KMM-1	HSRRB
KMS-12PE	DSMZ
KMS-20	JCRB
KMS-26	HSRRB
KMS-27	JCRB
KMS-28PE	HSRRB
KMS-34	JCRB
KOPN8	ATCC
LP-1	ATCC
MC116	ATCC
MDAMB231	ATCC
Melho	DSMZ
Mewo	ATCC
ML2	DSMZ
MOLM-13	DSMZ
MOLP-8	DSMZ
MOLT16	DSMZ
MOLT4	ATCC
MV411	ATCC
Namalwa	ATCC
NB4	DSMZ
NOMO-1	DSMZ
OCI-AML2	DSMZ
OCI-AML3	DSMZ
OCI-AML5	DSMZ
OCI-LY-19	DSMZ
OPM-2	ATCC
PL21	DSMZ
Raji	ATCC
Ramos	ATCC
RC-K8	DSMZ
REH	ATCC
RL	DSMZ
RPMI8226	ATCC
set-2	DSMZ
SKMEL28	ATCC
SKNAS	ATCC
SKNDZ	ATCC
ST486	ATCC
SU-DHL-4	ATCC
SU-DHL-5	ATCC
SU-DHL-6	ATCC
SU-DHL-8	ATCC
SW48	ATCC
SW480	ATCC
SW620	ATCC
THP-1	ATCC
U266	ATCC
U-2932	DSMZ
U2940	DSMZ
WSU-DLCL2	ATCC
Z-138	ATCC
	HSRRB cell lines are now distributed by JCRB
	All cell line vendors authenticate cell lines by STR genotyping
	Cell lines were obtained between 2009 and 2012, and early passage stocks were used for all experiments
