# Supplementary material for: Preclinical Anticancer Efficacy of BET Bromodomain Inhibitors Is Determined by the Apoptotic Response
Source: Oxford University Press journal article supplement (doi:10.1158/0008-5472.can-15-1458), 2016-01-13
Supplement: 00085472can151458-sup-150379_2_supp_3250368_nyxhxq.docx [file 00085472can151458-sup-150379_2_supp_3250368_nyxhxq.docx]

| **Supporting information for Figure 3A** | | | |  |  |  |
| --- | --- | --- | --- | --- | --- | --- |
|  |  |  |  |  |  |  |
| Cell line | Type | GI50 (M) | %subG1 | %G1 incr | ZsubG1 | ZG1 increase |
| Kasumi-1 | leukemia | 0.02 | 73.67 | 6.44 | 3.93 | -0.61 |
| KOPN8 | leukemia | 0.03 | 35.06 | 36.44 | 1.34 | 1.18 |
| MV411 | leukemia | 0.04 | 64.11 | 6.20 | 3.29 | -0.63 |
| set-2 | leukemia | 0.04 | 56.33 | 7.70 | 2.77 | -0.54 |
| H929 | myeloma | 0.04 | 49.30 | 11.94 | 2.30 | -0.29 |
| OCI-AML3 | leukemia | 0.04 | 70.50 | 30.21 | 3.71 | 0.81 |
| JJN-3 | myeloma | 0.04 | 36.85 | 12.63 | 1.46 | -0.24 |
| AMO-1 | myeloma | 0.05 | 57.20 | 16.16 | 2.83 | -0.03 |
| NOMO-1 | leukemia | 0.05 | 38.17 | 18.78 | 1.55 | 0.12 |
| KMS-12PE | myeloma | 0.05 | 41.48 | 1.92 | 1.77 | -0.89 |
| THP-1 | leukemia | 0.06 | 14.67 | 16.03 | -0.02 | -0.04 |
| KMS-26 | myeloma | 0.06 | 43.32 | 14.98 | 1.90 | -0.10 |
| MOLP-8 | myeloma | 0.06 | 21.77 | 17.42 | 0.46 | 0.04 |
| HL-60 | leukemia | 0.07 | 34.02 | 4.56 | 1.27 | -0.73 |
| LP-1 | myeloma | 0.07 | 41.51 | 30.90 | 1.78 | 0.85 |
| NB4 | leukemia | 0.07 | 37.15 | 0.27 | 1.48 | -0.98 |
| OCI-AML2 | leukemia | 0.07 | 40.40 | 22.35 | 1.70 | 0.34 |
| ML2 | leukemia | 0.08 | 13.73 | 24.73 | -0.08 | 0.48 |
| ST486 | Burkitt's | 0.08 | 55.83 | 26.62 | 2.73 | 0.59 |
| OPM-2 | myeloma | 0.08 | 16.92 | 2.05 | 0.13 | -0.88 |
| MOLM-13 | leukemia | 0.09 | 11.87 | 13.17 | -0.21 | -0.21 |
| Namalwa | Burkitt's | 0.11 | 20.30 | 17.43 | 0.36 | 0.04 |
| CA46 | Burkitt's | 0.11 | 12.30 | 34.78 | -0.18 | 1.08 |
| PL21 | leukemia | 0.11 | 5.93 | 27.91 | -0.60 | 0.67 |
| KMS-28PE | myeloma | 0.12 | 38.13 | 3.61 | 1.55 | -0.78 |
| KMS-27 | myeloma | 0.14 | 16.50 | 19.93 | 0.10 | 0.19 |
| KMM-1 | myeloma | 0.15 | 35.20 | 38.51 | 1.35 | 1.30 |
| SU-DHL-6 | DLBCL | 0.15 | 17.50 | 25.95 | 0.17 | 0.55 |
| Z-138 | lymphoma | 0.15 | 4.80 | 2.22 | -0.68 | -0.87 |
| Ramos | Burkitt's | 0.17 | 14.95 | 27.55 | 0.00 | 0.65 |
| RC-K8 | DLBCL | 0.17 | 3.13 | 7.09 | -0.79 | -0.58 |
| RL | lymphoma | 0.20 | 5.23 | 23.36 | -0.65 | 0.40 |
| WSU-DLCL2 | DLBCL | 0.22 | 20.35 | 16.71 | 0.36 | 0.00 |
| U-2932 | DLBCL | 0.23 | 1.73 | 13.56 | -0.88 | -0.19 |
| KMS-20 | myeloma | 0.23 | -8.89 | 25.36 | -1.59 | 0.52 |
| Raji | Burkitt's | 0.24 | 19.43 | 17.43 | 0.30 | 0.04 |
| SU-DHL-8 | DLBCL | 0.29 | -4.90 | 29.06 | -1.33 | 0.74 |
| DOHH-2 | DLBCL | 0.31 | 8.95 | 32.13 | -0.40 | 0.92 |
| Reh | leukemia | 0.39 | 1.17 | 1.91 | -0.92 | -0.89 |
| OCI-AML5 | leukemia | 0.45 | 4.59 | 15.01 | -0.69 | -0.10 |
| KMS-34 | myeloma | 0.55 | 3.99 | 6.21 | -0.73 | -0.63 |
| K562 | leukemia | 0.56 | 0.00 | 1.15 | -1.00 | -0.93 |
| OCI-LY-19 | DLBCL | 0.56 | 0.87 | 8.12 | -0.94 | -0.51 |
| KARPAS-422 | DLBCL | 0.90 | 1.97 | 17.92 | -0.87 | 0.07 |
| SU-DHL-5 | DLBCL | 1.03 | 10.70 | 17.61 | -0.28 | 0.05 |
| SU-DHL-4 | DLBCL | 1.15 | 14.70 | 9.91 | -0.02 | -0.41 |
| U266 | myeloma | 1.18 | 6.92 | 24.57 | -0.54 | 0.47 |
| HT | DLBCL | 1.53 | 2.07 | 16.91 | -0.86 | 0.01 |
| MC116 | lymphoma | 1.60 | 8.87 | 9.15 | -0.41 | -0.45 |
| U2940 | DLBCL | 1.63 | -1.53 | 9.08 | -1.10 | -0.46 |
| Daudi | Burkitt's | 2.00 | 7.59 | 47.13 | -0.49 | 1.82 |
|  |  | median | 14.95 | 16.71 |  |  |

| **Supporting data for Figure 3B** |  |  |  |  |  | Fold change vs. DMSO | | |  |  |  |
| --- | --- | --- | --- | --- | --- | --- | --- | --- | --- | --- | --- |
|  |  |  |  |  |  |  |  |  |  |  |  |
| Cell line | Apoptosis | BCL2A1 | BCLXL | BCL2 | BIM | BMF | HRK | BAD | PUMA | NOXA | APAF1 |
| Kasumi-1 | 3.926363 | 0.2 | 0.3 | 0.4 | 3.1 | 10.6 | 4.6 | 3.2 | 2.7 | 1.7 | 2.0 |
| MV4-11 | 3.287273 | 1.3 | 0.6 | 0.2 | 2.1 | 2.8 | 5.8 | 3.1 | 1.4 | 1.3 | 1.4 |
| SET2 | 2.767219 | 0.3 | 0.6 | 0.2 | 4.7 | 16.5 | 8.1 | 4.9 | 1.6 | 1.4 | 1.8 |
| NB4 | 1.484358 | 0.0 | 0.3 | 0.1 | 1.2 | 3.9 | 2.2 | 1.6 | 0.1 | 0.2 | 0.8 |
| HL60 | 1.274821 | 1.2 | 0.4 | 0.1 | 1.3 | 6.2 | 2.3 | 2.1 | 2.4 | 1.5 | 2.0 |
| DLCL2 | 0.361103 | 0.7 | 2.4 | 2 | 1.4 | 2.1 | 2.1 | 3.9 | 1.8 | 3.1 | 2.1 |
| SUDHL4 | -0.01696 | 0.1 | 1.1 | 1.8 | 0.8 | 2.6 | 1.5 | 1.2 | 4.6 | 1.1 | 1.8 |
| THP-1 | -0.01919 | 0.1 | 0.4 | 0.1 | 2.9 | 9.5 | 1.5 | 1.5 | 0.7 | 0.8 | 0.9 |
| ML2 | -0.0816 | 0.7 | 0.4 | 0.1 | 1.3 | 3.0 | 1.6 | 1.6 | 0.7 | 0.9 | 2.1 |
| MOLM-13 | -0.20643 | 0.5 | 0.3 | 0.2 | 0.9 | 0.6 | 0.6 | 0.5 | 0.7 | 0.4 | 0.6 |
| SUDHL5 | -0.28445 | 0.3 | 1.1 | 0.1 | 0.8 | 2.3 | 0.9 | 0.2 | 1.1 | 1.6 | 2.2 |
| DOHH2 | -0.40148 | 4.5 | 1.6 |  | 1.5 | 3.1 | 2.8 | 3.2 | 10.8 | 0.8 | 2 |
| K562 | -1 | 0.1 | 0.8 | 0.3 | 1.0 | 3.6 | 0.8 | 0.9 | 0.5 | 0.2 | 0.9 |

|  |  |  |  |  | Log2FC |  |  |  |  |  |
| --- | --- | --- | --- | --- | --- | --- | --- | --- | --- | --- |
|  | anti-apoptotic | |  | pro-apoptotic | |  |  |  |  |  |
| Cell line | BCL2A1 | BCL2L1 | BCL2 | BCL2L11 | BMF | HRK | BAD | BBC3 | PMAIP | APAF1 |
| Kasumi-1 | -2.41362 | -1.5912 | -1.17818 | 1.653865 | 3.399898 | 2.188199 | 1.690517 | 1.410003 | 0.798796 | 0.984071 |
| MV4-11 | 0.416459 | -0.73776 | -2.68272 | 1.101028 | 1.492243 | 2.541183 | 1.616045 | 0.461097 | 0.356459 | 0.481097 |
| SET2 | -1.69338 | -0.79824 | -2.3045 | 2.246325 | 4.04842 | 3.012433 | 2.290467 | 0.681114 | 0.533001 | 0.865218 |
| NB4 | -7.1497 | -1.92534 | -3.02849 | 0.204724 | 1.953463 | 1.124258 | 0.685632 | -3.5626 | -2.18724 | -0.23627 |
| HL60 | 0.290724 | -1.22877 | -3.10903 | 0.420429 | 2.640429 | 1.20017 | 1.077683 | 1.290724 | 0.571234 | 1.009391 |
| DLCL2 | -0.51457 | 1.263034 | 1 | 0.485427 | 1.070389 | 1.070389 | 1.963474 | 0.847997 | 1.632268 | 1.070389 |
| SUDHL4 | -3.32193 | 0.137504 | 0.847997 | -0.32193 | 1.378512 | 0.584963 | 0.263034 | 2.201634 | 0.137504 | 0.847997 |
| THP-1 | -3.20337 | -1.16342 | -2.85304 | 1.5368 | 3.244332 | 0.591111 | 0.561025 | -0.51572 | -0.41407 | -0.22342 |
| ML2 | -0.56364 | -1.18813 | -2.87535 | 0.392061 | 1.586595 | 0.652837 | 0.651871 | -0.42771 | -0.0978 | 1.070159 |
| MOLM-13 | -0.92344 | -1.85304 | -2.60343 | -0.1087 | -0.73856 | -0.67733 | -0.93262 | -0.55987 | -1.21829 | -0.64201 |
| SUDHL5 | -1.73697 | 0.137504 | -3.32193 | -0.32193 | 1.201634 | -0.152 | -2.32193 | 0.137504 | 0.678072 | 1.137504 |
| DOHH2 | 2.169925 | 0.678072 |  | 0.584963 | 1.632268 | 1.485427 | 1.678072 | 3.432959 | -0.32193 | 1 |
| K562 | -4.00037 | -0.38747 | -1.95774 | -0.07206 | 1.838351 | -0.39247 | -0.13233 | -0.96002 | -2.07221 | -0.1531 |

| anti-apoptotic | |  | pro-apoptotic | |  |  |  |  |  |  |  |
| --- | --- | --- | --- | --- | --- | --- | --- | --- | --- | --- | --- |
| BCL2A1 | BCL2L1 | BCL2 | BCL2L11 | BMF | HRK | BAD | BBC3 | PMAIP | APAF1 |  |  |
| down 2-fold? | down 2-fold? | down 2-fold? | up 2-fold? | up 2-fold? | up 2-fold? | up 2-fold? | up 2-fold? | up 2-fold? | up 2-fold? | composite | Z subG1 |
| 1 | 1 | 1 | 1 | 1 | 1 | 1 | 1 | 0 | 0 | 8 | 3.926363 |
| 0 | 0 | 1 | 1 | 1 | 1 | 1 | 0 | 0 | 0 | 5 | 3.287273 |
| 1 | 0 | 1 | 1 | 1 | 1 | 1 | 0 | 0 | 0 | 6 | 2.767219 |
| 1 | 1 | 1 | 0 | 1 | 1 | 0 | 0 | 0 | 0 | 5 | 1.484358 |
| 0 | 1 | 1 | 0 | 1 | 1 | 1 | 1 | 0 | 1 | 7 | 1.274821 |
|  |  |  |  |  |  |  |  |  |  |  |  |
| 0 | 0 | 0 | 0 | 1 | 1 | 1 | 0 | 1 | 1 | 5 | 0.361103 |
| 1 | 0 | 0 | 0 | 1 | 0 | 0 | 1 | 0 | 0 | 3 | -0.01696 |
| 1 | 1 | 1 | 1 | 1 | 0 | 0 | 0 | 0 | 0 | 5 | -0.01919 |
| 0 | 1 | 1 | 0 | 1 | 0 | 0 | 0 | 0 | 1 | 4 | -0.0816 |
| 0 | 1 | 1 | 0 | 0 | 0 | 0 | 0 | 0 | 0 | 2 | -0.20643 |
| 1 | 0 | 1 | 0 | 1 | 0 | 0 | 0 | 0 | 1 | 4 | -0.28445 |
| 0 | 0 | 0 | 0 | 1 | 1 | 1 | 1 | 0 | 0 | 4 | -0.40148 |
| 1 | 0 | 1 | 0 | 1 | 0 | 0 | 0 | 0 | 0 | 3 | -1 |

**Supporting information for Figure 4D**

|  | GI50 | dCT BCL2 | dCt BCLxL | ddCt median BCL2 | ddCt median BCL2L1 | log2FC BCL2 | log2FC BCL2L1 |
| --- | --- | --- | --- | --- | --- | --- | --- |
| MDAMB231 | 193.89 | 8.71 | 2.90 | 2.03 | -2.75 | -2.03 | 2.75 |
| SW480 | 2.00 | 8.28 | 3.08 | 1.60 | -2.57 | -1.60 | 2.57 |
| SW48 | 0.37 | 8.03 | 3.95 | 1.35 | -1.71 | -1.35 | 1.71 |
| HCC1143 | 1113.60 | 11.63 | 4.01 | 4.95 | -1.64 | -4.95 | 1.64 |
| Daudi | 2.00 | 7.24 | 4.13 | 0.56 | -1.52 | -0.56 | 1.52 |
| HT29 | 0.17 | 16.02 | 4.13 | 9.34 | -1.52 | -9.34 | 1.52 |
| SW620 | 683.71 | 10.56 | 4.57 | 3.88 | -1.09 | -3.88 | 1.09 |
| SET2 | 0.04 | 7.81 | 4.75 | 1.13 | -0.90 | -1.13 | 0.90 |
| HCT116 | 2.00 | 10.71 | 4.81 | 4.02 | -0.85 | -4.02 | 0.85 |
| HCT15 | 1.68 | 9.61 | 5.05 | 2.92 | -0.61 | -2.92 | 0.61 |
| IGR39 | 13.06 | 9.78 | 5.08 | 3.10 | -0.57 | -3.10 | 0.57 |
| Melho | 0.12 | 7.04 | 5.66 | 0.36 | 0.00 | -0.36 | 0.00 |
| SKMEL28 | 0.21 | 7.10 | 5.91 | 0.42 | 0.25 | -0.42 | -0.25 |
| KMM1 | 0.15 | 2.32 | 3.02 | -4.36 | -2.63 | 4.36 | 2.63 |
| MOLT4 | 3.56 | 4.56 | 3.32 | -2.12 | -2.33 | 2.12 | 2.33 |
| Raji | 0.24 | 3.58 | 4.01 | -3.10 | -1.64 | 3.10 | 1.64 |
| REH | 0.39 | 1.90 | 4.35 | -4.78 | -1.30 | 4.78 | 1.30 |
| MC116 | 1.60 | 3.28 | 4.57 | -3.40 | -1.08 | 3.40 | 1.08 |
| KARPAS422 | 0.90 | 2.12 | 5.16 | -4.56 | -0.49 | 4.56 | 0.49 |
| CA46 | 0.11 | 5.65 | 5.34 | -1.03 | -0.31 | 1.03 | 0.31 |
| SKNDZ | 0.27 | 5.23 | 5.37 | -1.45 | -0.28 | 1.45 | 0.28 |
| U266 | 1.18 | 4.69 | 5.45 | -1.99 | -0.20 | 1.99 | 0.20 |
| SUDHL5 | 1.03 | 9.95 | 6.58 | 3.27 | 0.93 | -3.27 | -0.93 |
| SKNAS | 0.15 | 8.46 | 6.97 | 1.78 | 1.32 | -1.78 | -1.32 |
| Colo783 | 12.97 | 7.95 | 6.99 | 1.27 | 1.34 | -1.27 | -1.34 |
| Colo829 | 0.33 | 9.36 | 7.19 | 2.68 | 1.54 | -2.68 | -1.54 |
| CHP212 | 0.13 | 10.62 | 7.47 | 3.94 | 1.82 | -3.94 | -1.82 |
| RPMI8226 | 0.45 | 7.48 | 7.47 | 0.80 | 1.82 | -0.80 | -1.82 |
| A375 | 0.04 | 9.91 | 7.53 | 3.23 | 1.88 | -3.23 | -1.88 |
| IGR1 | 0.23 | 8.34 | 7.58 | 1.66 | 1.93 | -1.66 | -1.93 |
| CHL1 | 0.12 | 7.19 | 7.74 | 0.51 | 2.08 | -0.51 | -2.08 |
| MV411 | 0.01 | 2.64 | 6.24 | -4.04 | 0.59 | 4.04 | -0.59 |
| KMS26 | 0.06 | 4.29 | 6.27 | -2.39 | 0.62 | 2.39 | -0.62 |
| LP1 | 0.07 | 3.30 | 6.28 | -3.38 | 0.63 | 3.38 | -0.63 |
| Namalwa | 0.11 | 6.70 | 6.36 | 0.02 | 0.71 | -0.02 | -0.71 |
| MOLT16 | 0.00 | 3.83 | 6.42 | -2.85 | 0.77 | 2.85 | -0.77 |
| PL21 | 0.11 | 4.03 | 7.07 | -2.65 | 1.42 | 2.65 | -1.42 |
| Mewo | 0.23 | 6.66 | 7.26 | -0.02 | 1.61 | 0.02 | -1.61 |
| ML2 | 0.15 | 4.39 | 7.53 | -2.29 | 1.88 | 2.29 | -1.88 |
| HL60 | 0.12 | 4.00 | 7.56 | -2.68 | 1.91 | 2.68 | -1.91 |
| Molp8 | 0.06 | 6.92 | 8.03 | 0.24 | 2.38 | -0.24 | -2.38 |
| OPM2 | 0.08 | 6.24 | 8.44 | -0.44 | 2.79 | 0.44 | -2.79 |
| KMS27 | 0.14 | 6.11 | 9.26 | -0.57 | 3.61 | 0.57 | -3.61 |
| DOHH2 | 0.31 | 0.59 | 5.65 | -6.09 | 0.00 | 6.09 | 0.00 |
| K562 | 0.56 | 10.48 | 3.08 | 3.80 | -2.57 | -3.80 | 2.57 |
| Kasumi | 0.02 | 3.80 | 4.61 | -2.88 | -1.04 | 2.88 | 1.04 |
| MOLM13 | 0.09 | 2.02 | 6.17 | -4.67 | 0.52 | 4.67 | -0.52 |
| SUDHL-4 | 1.15 | -0.24 | 4.39 | -6.92 | -1.27 | 6.92 | 1.27 |
| THP-1 | 0.06 | 2.59 | 6.68 | -4.09 | 1.03 | 4.09 | -1.03 |
| WSU-DLCL2 | 0.22 | -0.40 | 3.95 | -7.08 | -1.70 | 7.08 | 1.70 |
| SUDHL5 | 1.03 | 8.17 | 6.36 | 1.49 | 0.71 | -1.49 | -0.71 |
| H929 | 0.04 | 5.24 | 5.41 | -1.44 | -0.24 | 1.44 | 0.24 |
|  |  |  |  |  |  |  |  |
|  | median | 6.68 | 5.65 |  |  |  |  |

**Supporting information for Figure S6**

|  | intensity | ng norm to 0.5 ng | ng norm to 2 ng | average | per ug of lysate (50 ug) |
| --- | --- | --- | --- | --- | --- |
| .5 ng bclxl | 138000 |  |  |  |  |
| Opm2 | 32100 | 0.1163 | 0.0544 | 0.0854 | 0.0017 |
| DOHH2 | 24400 | 0.0884 | 0.0414 | 0.0649 | 0.0013 |
| K562 | 704000 | 2.5507 | 1.1932 | 1.8720 | 0.0374 |
| Kasumi | 96000 | 0.3478 | 0.1627 | 0.2553 | 0.0051 |
| MOLM13 | 13000 | 0.0471 | 0.0220 | 0.0346 | 0.0007 |
| Raji | 55400 | 0.2007 | 0.0939 | 0.1473 | 0.0029 |
| SUDHL4 | 50300 | 0.1822 | 0.0853 | 0.1338 | 0.0027 |
| 2 ng bclxl | 1180000 |  |  |  |  |
|  |  |  |  |  |  |
| .5 ng bclxl | 118000 |  |  |  |  |
| THP-1 | 32000 | 0.1356 | 0.0621 | 0.0989 | 0.0020 |
| WSU-DLCL2 | 101000 | 0.4280 | 0.1961 | 0.3120 | 0.0062 |
| SUDHL5 | 9570 | 0.0406 | 0.0186 | 0.0296 | 0.0006 |
| LP1 | 99700 | 0.4225 | 0.1936 | 0.3080 | 0.0062 |
| MV411 | 30900 | 0.1309 | 0.0600 | 0.0955 | 0.0019 |
| MC116 | 234000 | 0.9915 | 0.4544 | 0.7229 | 0.0145 |
| REH | 155000 | 0.6568 | 0.3010 | 0.4789 | 0.0096 |
| 2 ng bclxl | 1030000 |  |  |  |  |
|  |  |  |  |  |  |
| .5 ng bclxl | 7170 |  |  |  |  |
| Namalwa | 5000 | 0.3487 | 0.2519 | 0.3003 | 0.0060 |
| MOLT4 | 25200 | 1.7573 | 1.2695 | 1.5134 | 0.0303 |
| MOLT16 | 2900 | 0.2022 | 0.1461 | 0.1742 | 0.0035 |
| ML2 | 1100 | 0.0767 | 0.0554 | 0.0661 | 0.0013 |
| KMS26 | 29600 | 2.0642 | 1.4912 | 1.7777 | 0.0356 |
| HL60 | 2270 | 0.1583 | 0.1144 | 0.1363 | 0.0027 |
| Daudi | 24800 | 1.7294 | 1.2494 | 1.4894 | 0.0298 |
| 2 ng bclxl | 39700 |  |  |  |  |
|  |  |  |  |  |  |
| .5 ng bclxl | 74700 |  |  |  |  |
| CA46 | 19500 | 0.1305 | 0.1054 | 0.1180 | 0.0024 |
| KARPAS422 | 815 | 0.0055 | 0.0044 | 0.0049 | 0.0001 |
| KMM1 | 71100 | 0.4759 | 0.3843 | 0.4301 | 0.0086 |
| KMS27 | 2390 | 0.0160 | 0.0129 | 0.0145 | 0.0003 |
| MOLP8 | 6780 | 0.0454 | 0.0366 | 0.0410 | 0.0008 |
| H929 | 37400 | 0.2503 | 0.2022 | 0.2262 | 0.0045 |
| PL21 | 8280 | 0.0554 | 0.0448 | 0.0501 | 0.0010 |
| 2 ng bclxl | 370000 |  |  |  |  |
|  |  |  |  |  |  |
| .5 ng bclxl | 67300 |  |  |  |  |
| RPMI8226 | 89100 | 0.6620 | 0.5335 | 0.5977 | 0.0120 |
| SET2 | 131000 | 0.9733 | 0.7844 | 0.8788 | 0.0176 |
| U266 | 266000 | 1.9762 | 1.5928 | 1.7845 | 0.0357 |
| 2 ng bclxl | 334000 |  |  |  |  |
| 10 ng bcl2 | 16400 |  |  |  |  |
| Opm2 | 25700 | 15.6707 | 16.7318 | 16.2013 | 0.3240 |
| DOHH2 | 104000 | 63.4146 | 67.7083 | 65.5615 | 1.3112 |
| K562 | 666 | 0.4061 | 0.4336 | 0.4198 | 0.0084 |
| Kasumi | 25100 | 15.3049 | 16.3411 | 15.8230 | 0.3165 |
| MOLM13 | 54900 | 33.4756 | 35.7422 | 34.6089 | 0.6922 |
| Raji | 7840 | 4.7805 | 5.1042 | 4.9423 | 0.0988 |
| SUDHL4 | 74000 | 45.1220 | 48.1771 | 46.6495 | 0.9330 |
| 50 ng bcl2 | 76800 |  |  |  |  |
|  |  |  |  |  |  |
| 10 ng bcl2 | 2890000 |  |  |  |  |
| THP-1 | 2310000 | 7.9931 | 15.7357 | 11.8644 | 0.2373 |
| WSU-DLCL2 | 2950000 | 10.2076 | 20.0954 | 15.1515 | 0.3030 |
| SUDHL5 | 16400 | 0.0567 | 0.1117 | 0.0842 | 0.0017 |
| LP1 | 1800000 | 6.2284 | 12.2616 | 9.2450 | 0.1849 |
| MV411 | 3250000 | 11.2457 | 22.1390 | 16.6923 | 0.3338 |
| MC116 | 1740000 | 6.0208 | 11.8529 | 8.9368 | 0.1787 |
| REH | 5130000 | 17.7509 | 34.9455 | 26.3482 | 0.5270 |
| 50 ng bcl2 | 7340000 |  |  |  |  |
|  |  |  |  |  |  |
| 10 ng bcl2 | 2340000 |  |  |  |  |
| Namalwa | 170000 | 0.7265 | 1.4238 | 1.0751 | 0.0215 |
| MOLT4 | 671000 | 2.8675 | 5.6198 | 4.2436 | 0.0849 |
| MOLT16 | 1210000 | 5.1709 | 10.1340 | 7.6525 | 0.1530 |
| ML2 | 1430000 | 6.1111 | 11.9765 | 9.0438 | 0.1809 |
| KMS26 | 1220000 | 5.2137 | 10.2178 | 7.7157 | 0.1543 |
| HL60 | 1760000 | 7.5214 | 14.7404 | 11.1309 | 0.2226 |
| Daudi | 22500 | 0.0962 | 0.1884 | 0.1423 | 0.0028 |
| 50 ng bcl2 | 5970000 |  |  |  |  |
|  |  |  |  |  |  |
| 10 ng bcl2 | 1910000 |  |  |  |  |
| CA46 | 432000 | 2.2618 | 3.7631 | 3.0124 | 0.0602 |
| KARPAS422 | 2380000 | 12.4607 | 20.7317 | 16.5962 | 0.3319 |
| KMM1 | 1190000 | 6.2304 | 10.3659 | 8.2981 | 0.1660 |
| KMS27 | 3070000 | 16.0733 | 26.7422 | 21.4077 | 0.4282 |
| MOLP8 | 153000 | 0.8010 | 1.3328 | 1.0669 | 0.0213 |
| H929 | 481000 | 2.5183 | 4.1899 | 3.3541 | 0.0671 |
| PL21 | 1550000 | 8.1152 | 13.5017 | 10.8085 | 0.2162 |
| 50 ng bcl2 | 5740000 |  |  |  |  |
|  |  |  |  |  |  |
| 10 ng bcl2 | 2840000 |  |  |  |  |
| RPMI8226 | 1800000 | 6.3380 | 14.4928 | 10.4154 | 0.2083 |
| SET2 | 265000 | 0.9331 | 2.1337 | 1.5334 | 0.0307 |
| U266 | 1920000 | 6.7606 | 15.4589 | 11.1098 | 0.2222 |

| cell line | BCL2, ng/ug lysate | BCL2L1, ng/ug lysate | BCL2/BCL2L1 | GI50 |
| --- | --- | --- | --- | --- |
| KARPAS422 | 0.331924403 | 9.86056E-05 | 3366.182293 | 0.897527 |
| KMS27 | 0.428154587 | 0.000289162 | 1480.671637 | 0.143333 |
| DOHH2 | 1.311229675 | 0.001297617 | 1010.49029 | 0.313333 |
| MOLM13 | 0.692177973 | 0.000691353 | 1001.192584 | 0.093333 |
| SUDHL4 | 0.932990346 | 0.002675006 | 348.7806369 | 1.15 |
| PL21 | 0.216169254 | 0.001001784 | 215.7842012 | 0.111667 |
| Opm2 | 0.324025025 | 0.001707111 | 189.8089657 | 0.08 |
| MV411 | 0.333846393 | 0.001909322 | 174.8507519 | 0.008445 |
| THP-1 | 0.237287744 | 0.001977291 | 120.0064598 | 0.056667 |
| HL60 | 0.22261736 | 0.002726561 | 81.64765826 | 0.124205 |
| ML2 | 0.180876605 | 0.001321241 | 136.8989997 | 0.151286 |
| Kasumi | 0.316460239 | 0.00510538 | 61.98564435 | 0.022 |
| REH | 0.526963691 | 0.009577505 | 55.02097595 | 0.39 |
| WSU-DLCL2 | 0.303029803 | 0.006240826 | 48.55604048 | 0.220013 |
| MOLT16 | 0.153049435 | 0.003483272 | 43.93840575 | 0.002767 |
| Raji | 0.098846545 | 0.002946229 | 33.5501858 | 0.237827 |
| LP1 | 0.184899541 | 0.006160499 | 30.01372986 | 0.066667 |
| MOLP8 | 0.021337997 | 0.000820302 | 26.01237581 | 0.06385 |
| CA46 | 0.060248463 | 0.002359275 | 25.53685546 | 0.1069 |
| KMM1 | 0.165962202 | 0.008602279 | 19.29281694 | 0.150379 |
| RPMI8226 | 0.208307818 | 0.011954943 | 17.42440911 | 0.452946 |
| H929 | 0.067082201 | 0.004524968 | 14.82489947 | 0.037225 |
| MC116 | 0.178736223 | 0.014458944 | 12.36163777 | 1.6 |
| U266 | 0.222195006 | 0.035690402 | 6.225623466 | 1.175 |
| KMS26 | 0.154314307 | 0.035553401 | 4.340352902 | 0.063333 |
| Namalwa | 0.021502813 | 0.006005642 | 3.580435377 | 0.106181 |
| SUDHL5 | 0.00168464 | 0.000591334 | 2.84888247 | 1.026667 |
| MOLT4 | 0.084872869 | 0.030268436 | 2.804005764 | 3.559585 |
| SET2 | 0.03066754 | 0.017576852 | 1.744768599 | 0.036667 |
| K562 | 0.008396913 | 0.03743945 | 0.224279821 | 0.555274 |
| Daudi | 0.002845961 | 0.029787985 | 0.095540555 | 2 |
